# Supplementary material
Source: MDPI journal article supplement (https://www.mdpi.com/2071-1050/10/4/945)
Supplement: s1 [file s1]

# Supplementary material: Survey Questions from the "Edible Gardens" project

## Category #1: Gardening background

1. Do you grow food at home, at a community garden, or at a school? (Please select the main place you grow food. If you grow food at more than one place you can complete the survey again)

☐ At home

☐ At a community garden

☐ At a school

2. How long have you been growing food?

☐ Less than 1 year

☐ 1 - 5 years

☐ 6 - 10 years

☐ 11+ years

3. How would you describe your gardening consistency:

☐ On and off again

☐ Seasonal e.g. every summer

☐ All through the year.

☐ Other (please describe):

4. What kinds of approaches to food gardening to you use? (Please check all that apply and add any extras not listed)

☐ Conventional gardening (i.e. digging and tilling the soil)

☐ Make own compost

☐ Have a worm farm

☐ No-dig gardening

☐ Low use of chemical fertilisers and pesticides

☐ Organic

☐ Permaculture

☐ Companion planting

☐ Bio-dynamic

☐ Other (please describe):

5. What were the top three things that delayed or challenged you getting into food gardening?

1.

2.

3.

6. Is there currently anything that makes it difficult for you to continue growing food?

☐ No

[Checkbox] Yes, (please describe): [Blank line]

## Category #2: Physical garden elements

7. How many different food producing areas do you have? For example, if you have a vegetable patch (1 area), some fruit trees (1 area) and some planter pots (1 area), then that's 3 areas in total. Or you might keep chickens in a poultry run (1 area), and have an aquaponics system (1 area), which makes 2 areas in total.

I have this many areas:

[Dropdown menu 1 – 20 areas]

8. What kinds of food producing areas do you have? (Please check all that apply):

[Checkbox] In ground bed/s

[Checkbox] Raised garden bed/s

[Checkbox] Pots or planters

[Checkbox] Fruit tree/s

[Checkbox] Vertical garden/s

[Checkbox] Poultry keeping - chickens

[Checkbox] Poultry keeping – other

[Checkbox] Aquaponics system

[Checkbox] Wicking beds

[Checkbox] Bee hive/s

[Checkbox] Other (please describe): [Blank line]

9. What is the approximate total size of all your food producing areas added together? An estimate is okay.

[Checkbox] Tiny: Less than 4 square metres

[Checkbox] Small: 5 sq. m – 15 sq. m.

[Checkbox] Medium: 16 sq. m – 30 sq. m.

[Checkbox] Large: 31 sq. m – 50 sq. m

[Checkbox] Huge: 50+ square metres

## Category #3: Garden inputs

10. On average how much time, per week, do you spend tending your food producing areas?

[Blank line] hours per week

11. Please estimate the number of hours spent gardening per week by the various members of your household:

[Blank line] Women over 18 years

[Blank line] Men over 18 years

[Blank line] Children less than 18 years

12. From where is the water you use on your food-producing areas sourced? (Please check all that apply):

☐ Mains water

☐ Rain water

☐ Recycled water / blended water (Purple piping)

☐ Grey water

☐ Other

13. How do you usually apply the water? (Please check all that apply):

☐ Manual irrigation with a hose, watering can or bucket

☐ Drip irrigation system (surface or sub-surface)

☐ Sprinkler

☐ Wick sub-irrigation / wicking beds

☐ Animal water (any method of providing water for urban livestock)

☐ Other

14. What do you estimate was the total cost to set up these food-producing areas?

\$

15. What do you estimate is the average monthly cost of things you add to your food-producing areas? This includes seeds, seedlings, soil improvement, tools, feed for livestock, or garden membership fees if part of a community garden.

\$

16. The following statement is about something that may motivate you to grow and maintain a food garden. Please rate the statement according to how true it is for you. When answering please consider any food production in your garden (e.g. vegetables, fruits, herbs, chickens, fish or bees etc.)

"I produce food to save money"

☐ Strongly disagree

☐ Disagree

☐ Neutral

☐ Agree

☐ Strongly agree

17. Do you save money by growing some of your own food? An estimate is okay.

☐ Yes, over 75% of my weekly household fruit and vegetable budget

☐ Yes, between 26-75% of my weekly household fruit and vegetable budget

☐ Yes, between 6-25% of my weekly household fruit and vegetable budget

☐ Yes, 0-5% of my weekly household fruit and vegetable budget

☐ I think we break even

☐ Unsure

☐ No, I don't think I save money

☐ No, I know I don't save money

☐ Not applicable (School garden)

#### Category #4: Demographics

18. How old are you?

☐ 18 – 20

☐ 21 – 30

☐ 31 – 40

☐ 41 – 50

☐ 51 – 60

☐ 61 – 70

☐ 71 – 80

☐ 81+

19. Please select your gender.

☐ Male

☐ Female

☐ Indeterminate/Intersex/Unspecified

20. Are you currently renting or do you own your own home?

☐ Renting

☐ Own my own home / have a mortgage

☐ Other situation (please describe):

21. How many people are there in your household?

22. How many of your household are of primary school age or younger?

23. How many of your household are over 65 years of age?

24. What is the highest level of education have you completed?

☐ School (Year 10)

☐ School (Year 11)

☐ School (Year 12)

☐ Diploma/Certificate

☐ Bachelor degree

☐ Postgraduate Degree

☐ Other (please specify)

25. What is the postcode of the suburb you live in?
